# Supplementary material for: The Brain Cannot Take Up Polyamines from the Blood Stream Leaving It Solely Dependent on Local Biosynthesis As Demonstrated Here with the Aid of Biotinylated Spermine
Source: Preprints.org preprint supplement (doi:10.20944/preprints202305.1643.v1), 2023-05-23
Supplement: Supplementary file 1 [file supplementary]

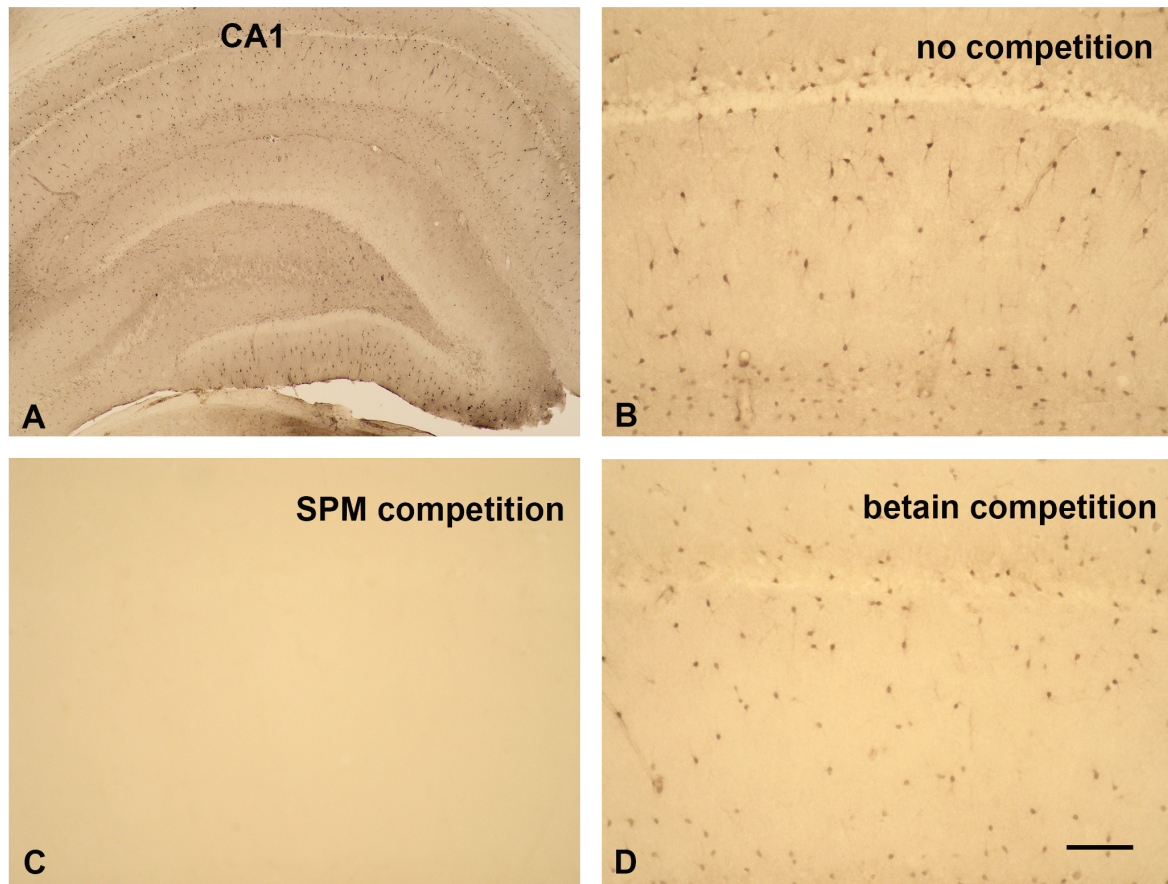

### Supplemental Figure

Competition experiments indicate that uptake of B-X-SPM is based on a PA-specific system

When the uptake of B-X-SPM is due to a PA-specific system, added native PAs, but not other cations, must act as competitors, reducing the uptake of B-X-SPM. This fact is documented here. (A) When surviving rat brain slices are superfused with artificial CSF containing B-X-SPM, it is eagerly taken up by astrocytes. They appear as tiny dots in survey micrographs of the hippocampus. (B) Higher magnification of the hippocampal CA1 area verifies that the small dots indeed are astrocytes. (C) When the superfusion fluid contains an excess of SPM in addition to B-X-SPM, uptake is abolished completely. (D) The presence of excess betain addition to B-X-SPM does result in any visible competition. Bar indicates 300  $\mu\text{m}$  in (A) and 70  $\mu\text{m}$  in (B), (C), and (D).
